# Supplementary material
Source: Springer Nature journal article supplement (https://www.springermedizin.de/resource/supplementary/12879_2013_2420_MOESM13_ESM.pdf/9444524)

**FIB-4****APRI****YKL-40****GCA**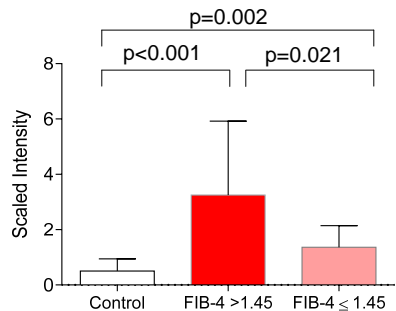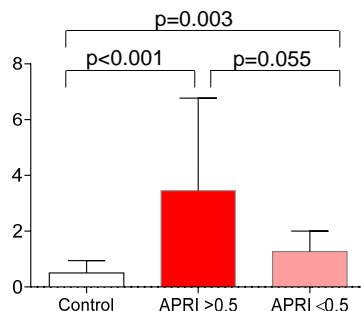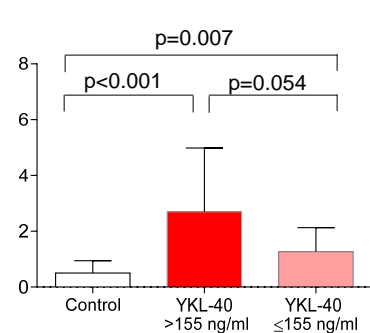**GDCA**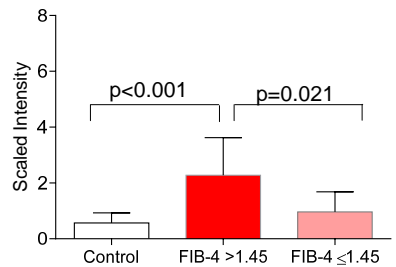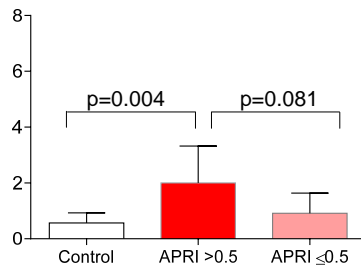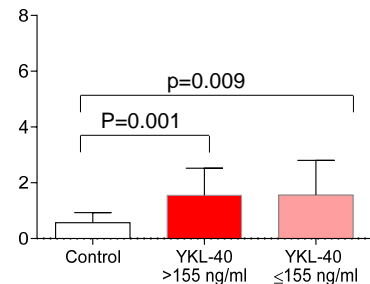**TCA**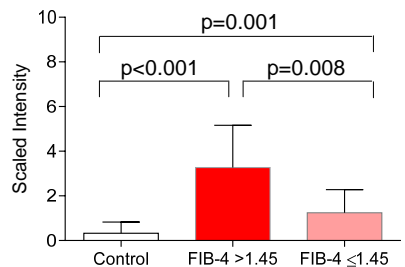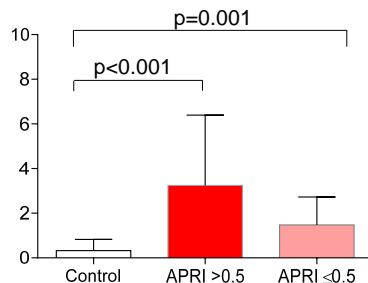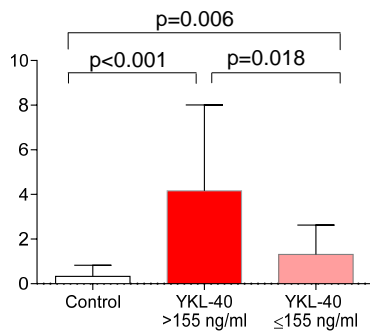

Supplement: MOESM13 [file 9444524]
